# Supplementary material for: The application of deep learning in lung cancerous lesion detection
Source: bioRxiv or medRxiv preprint supplement (doi:10.1101/2024.04.12.24305708), 2024-04-15

**Table S1. Characteristics, including age, gender, and causes of pneumonia, of patients whose CT scans were used**

|                            | <b>Lung cancer CT scans<br/>(n = 1014)</b> | <b>Non-cancer (Pneumonia) CT scans<br/>(n = 1014)</b> |
|----------------------------|--------------------------------------------|-------------------------------------------------------|
| <b>Age (year)</b>          |                                            |                                                       |
| 0 – 44                     | 7.89%                                      | 40.24%                                                |
| 45 – 54                    | 18.73%                                     | 13.02%                                                |
| 55 – 64                    | 29.59%                                     | 9.17%                                                 |
| From 65                    | 42.80%                                     | 10.75%                                                |
| Unknown                    | 0.99%                                      | 26.82%                                                |
| <b>Sex</b>                 |                                            |                                                       |
| Female                     | 49.70%                                     | 27.42%                                                |
| Male                       | 50.30%                                     | 45.56%                                                |
| Unknown                    | 0.00%                                      | 27.02%                                                |
| <b>Causes of pneumonia</b> |                                            |                                                       |
| Bacteria                   | N/A                                        | 32.56%                                                |
| Virus                      | N/A                                        | 48.64%                                                |
| Fungi                      | N/A                                        | 17.59%                                                |
| Mixed causes               | N/A                                        | 1.21%                                                 |

\*N/A: not available

**Table S2. Model training parameters and classifier architectures**

| No. | Base model        | Input size | Learning rate | Epsilon  | Epochs | Classifier architecture                                                                                                                                                              |
|-----|-------------------|------------|---------------|----------|--------|--------------------------------------------------------------------------------------------------------------------------------------------------------------------------------------|
| 1   | DenseNet121       | 224        | 6.00E-05      | 1.00E-02 | 120    | Up Sampling 2D (size=(4, 4))<br>Global Average Pooling 2D<br>Batch Normalization<br>Dropout (0.5)<br>Dense (256, ReLu)<br>Batch Normalization<br>Dropout (0.5)<br>Dense (2, Softmax) |
| 2   | MobileNetV2       | 224        | 1.00E-05      | 5.00E-03 | 120    | Up Sampling 2D (size=(4, 4))<br>Global Average Pooling 2D<br>Batch Normalization<br>Dropout (0.3)<br>Dense (256, ReLu)<br>Batch Normalization<br>Dropout (0.3)<br>Dense (2, Softmax) |
| 3   | InceptionV3       | 299        | 1.00E-05      | 1.00E-02 | 120    | Up Sampling 2D (size=(4, 4))<br>Global Average Pooling 2D<br>Batch Normalization<br>Dropout (0.3)<br>Dense (256, ReLu)<br>Batch Normalization<br>Dropout (0.3)<br>Dense (2, Softmax) |
| 4   | InceptionResNetV2 | 299        | 1.00E-04      | 7.50E-02 | 150    | Up Sampling 2D (size=(4, 4))<br>Global Average Pooling 2D<br>Batch Normalization<br>Dropout (0.5)<br>Dense (512, ReLu)                                                               |

|   |           |     |          |          |     |                                                                                                                                                                                                                                                   |
|---|-----------|-----|----------|----------|-----|---------------------------------------------------------------------------------------------------------------------------------------------------------------------------------------------------------------------------------------------------|
|   |           |     |          |          |     | Batch Normalization<br>Dropout (0.5)<br>Dense (2, Softmax)                                                                                                                                                                                        |
| 5 | ResNet50  | 224 | 1.00E-05 | 1.00E-02 | 100 | Up Sampling 2D (size=(4, 4))<br>Global Average Pooling 2D<br>Batch Normalization<br>Dropout (0.3)<br>Dense (256, ReLu)<br>Batch Normalization<br>Dropout (0.3)<br>Dense (128, ReLu)<br>Batch Normalization<br>Dropout (0.3)<br>Dense (2, Softmax) |
| 6 | ResNet101 | 224 | 1.00E-05 | 1.00E-02 | 120 | Up Sampling 2D (size=(4, 4))<br>Global Average Pooling 2D<br>Batch Normalization<br>Dropout (0.3)<br>Dense (512, ReLu)<br>Batch Normalization<br>Dropout (0.3)<br>Dense (256, ReLu)<br>Batch Normalization<br>Dropout (0.3)<br>Dense (2, Softmax) |
| 7 | VGG16     | 320 | 5E-06    | 1.00E-02 | 120 | Up Sampling 2D (size=(4, 4))<br>Global Average Pooling 2D<br>Batch Normalization<br>Dense (256, ReLu)<br>Batch Normalization<br>Dense (2, Softmax)                                                                                                |

|   |          |     |          |          |     |                                                                                                                                                                                                                                  |
|---|----------|-----|----------|----------|-----|----------------------------------------------------------------------------------------------------------------------------------------------------------------------------------------------------------------------------------|
| 8 | VGG19    | 320 | 5E-06    | 5.00E-03 | 120 | Up Sampling 2D (size=(4, 4))<br>Global Average Pooling 2D<br>Batch Normalization<br>Dense (256, ReLu)<br>Batch Normalization<br>Dense (2, Softmax)                                                                               |
| 9 | Xception | 299 | 1.00E-04 | 1.00E-01 | 120 | Up Sampling 2D (size=(4, 4))<br>Global Average Pooling 2D<br>Batch Normalization<br>Dense (256, ReLu)<br>Batch Normalization<br>Dropout (0.5)<br>Dense (128, ReLu)<br>Batch Normalization<br>Dropout (0.5)<br>Dense (2, Softmax) |

**Table S3. Number of trainable and non-trainable parameters of each fine-tuned model**

|                         | DenseNet121 | MobileNetV2 | InceptionV3 | InceptionResV2 | ResNet50   | ResNet101  | VGG16      | VGG19      | Xception   |
|-------------------------|-------------|-------------|-------------|----------------|------------|------------|------------|------------|------------|
| Total parameters        | 7,305,538   | 2,592,578   | 22,337,058  | 55,132,898     | 24,155,138 | 43,850,370 | 14,849,602 | 20,159,298 | 21,428,906 |
| Trainable parameters    | 3,154,882   | 2,075,842   | 14,005,890  | 24,335,074     | 17,776,002 | 23,993,602 | 11,932,418 | 14,292,226 | 11,118,346 |
| Nontrainable parameters | 4,150,656   | 516,736     | 8,331,168   | 30,797,824     | 6,379,136  | 19,856,768 | 2,917,184  | 5,867,072  | 10,310,560 |

**Figure S1: Curves of training accuracy and validation accuracy**

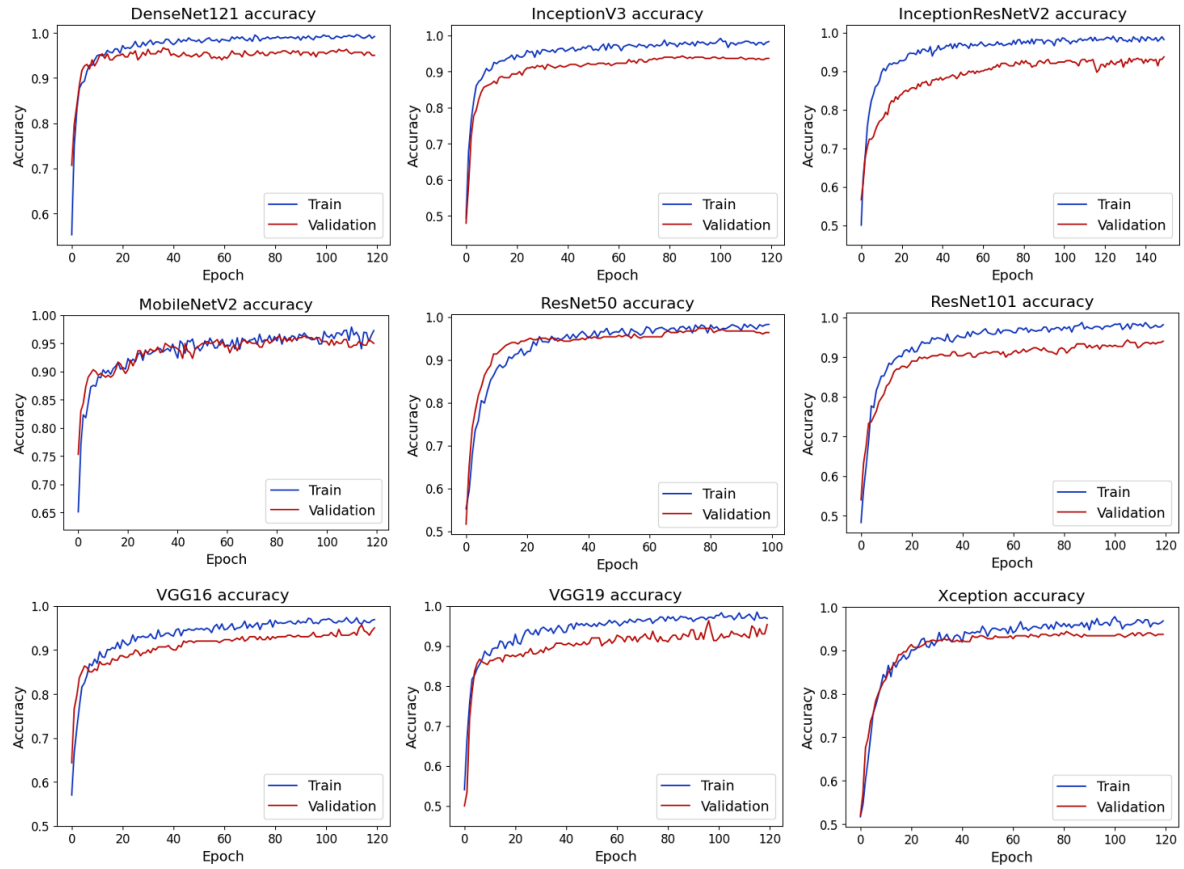

**Figure S2: Curves of training loss and validation loss**

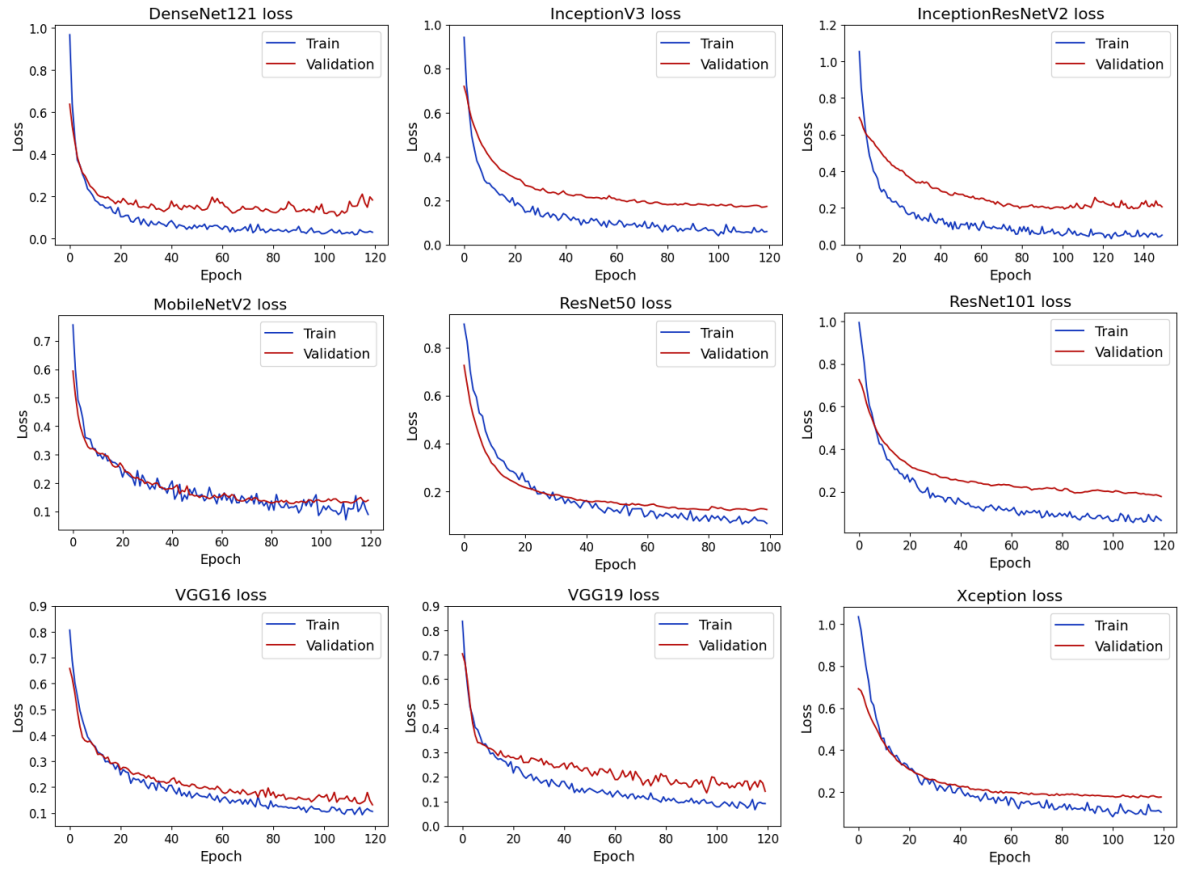

**Figure S3: Gradient-weighted Class Activation Map (Grad-CAM) for fine-tuned and pretrained layers of each model**

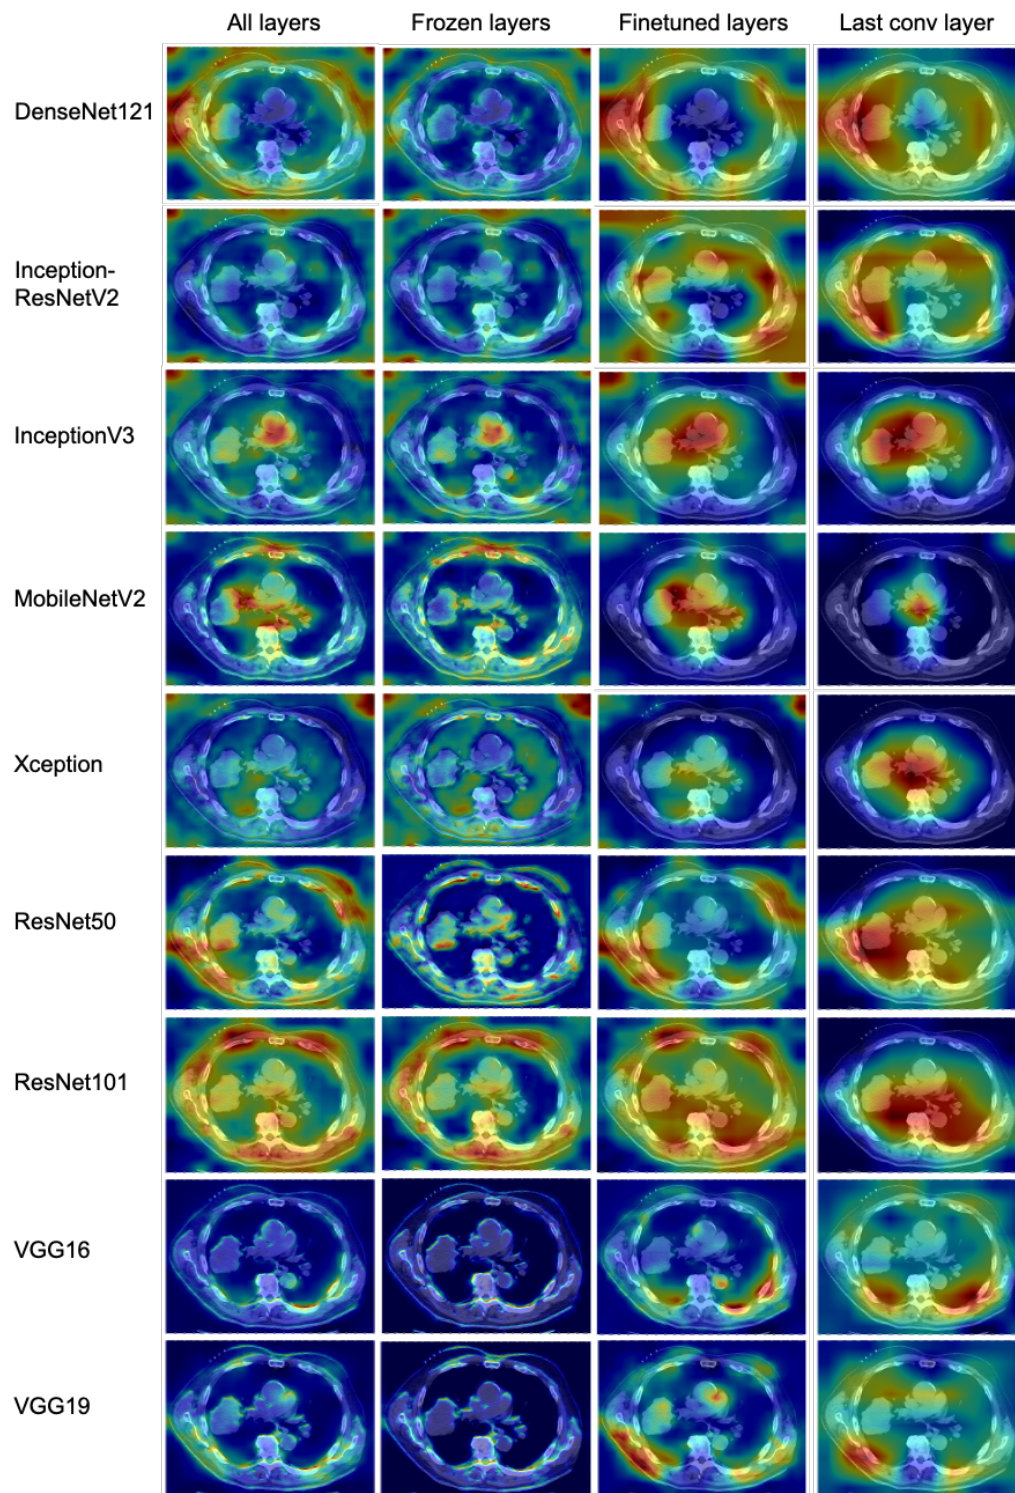

Supplement: Supplementary file [file media-1.pdf]
